1 **Needle in a haystack? A comparison of eDNA metabarcoding**  
2 **and targeted qPCR for detection of great crested newt**  
3 **(*Triturus cristatus*)**

4  
5 **Lynsey R. Harper<sup>1\*</sup>, Lori Lawson Handley<sup>1</sup>, Christoph Hahn<sup>1,2</sup>, Neil Boonham<sup>3,4</sup>,**  
6 **Helen C. Rees<sup>5</sup>, Kevin C. Gough<sup>6</sup>, Erin Lewis<sup>3</sup>, Ian P. Adams<sup>3</sup>, Peter Brotherton<sup>7</sup>,**  
7 **Susanna Phillips<sup>7</sup> and Bernd Hänfling<sup>1</sup>**

8  
9 <sup>1</sup>*School of Environmental Sciences, University of Hull, Hull, HU6 7RX, UK*

10 <sup>2</sup>*Institute of Zoology, University of Graz, Graz, Styria, Austria*

11 <sup>3</sup>*Fera, Sand Hutton, York, YO14 1LZ, UK*

12 <sup>4</sup>*Newcastle University, Newcastle upon Tyne, NE1 7RU, UK*

13 <sup>5</sup>*ADAS, School of Veterinary Medicine and Science, The University of Nottingham, Sutton Bonington*  
14 *Campus, Leicestershire, LE12 5RD, UK*

15 <sup>6</sup>*School of Veterinary Medicine and Science, The University of Nottingham, Sutton Bonington Campus,*  
16 *Leicestershire, LE12 5RD, UK*

17 <sup>7</sup>*Natural England, Peterborough, PE1 1NG, UK*

18

19 **\*Corresponding author: Lynsey Harper, [L.Harper@2015.hull.ac.uk](mailto:L.Harper@2015.hull.ac.uk)**

20

21 **Manuscript type:** Standard article

22 **Running title:** Metabarcoding and qPCR detection sensitivity

23 **Word count:** 8368

24

## 25 **Summary**

26  
27 Environmental DNA (eDNA) analysis is a rapid, cost-effective, non-invasive biodiversity monitoring tool which  
28 utilises DNA left behind in the environment by organisms for species detection. The method is used as a species-  
29 specific survey tool for rare or invasive species across a broad range of ecosystems. Recently, eDNA and  
30 ‘metabarcoding’ have been combined to describe whole communities rather than focusing on single target species.  
31 However, whether metabarcoding is as sensitive as targeted approaches for rare species detection remains to be  
32 evaluated. The great crested newt *Triturus cristatus* is a flagship pond species of international conservation concern  
33 and the first UK species to be routinely monitored using eDNA. We evaluate whether eDNA metabarcoding has  
34 comparable sensitivity to targeted real-time quantitative PCR (qPCR) for *T. cristatus* detection. Extracted eDNA  
35 samples (N = 532) were screened for *T. cristatus* by qPCR and analysed for all vertebrate species using High-  
36 Throughput Sequencing technology. With a detection threshold of 1/12 positive qPCR replicates, newts were  
37 detected in 50% ponds with qPCR. Detection decreased to 32% when the threshold was increased to 4/12 positive  
38 qPCR replicates. With metabarcoding, newts were detected in 34% of ponds when no detection threshold was  
39 applied, and in 28% of ponds when a threshold (0.028%) was applied. Therefore, qPCR provides greater detection  
40 than metabarcoding, but metabarcoding detection with no threshold is equivalent to qPCR with a stringent detection  
41 threshold. The proportion of *T. cristatus* sequences in each sample was positively associated with the number of  
42 positive qPCR replicates (qPCR score) suggesting eDNA metabarcoding may be indicative of eDNA concentration.  
43 eDNA metabarcoding holds enormous potential for holistic biodiversity assessment and routine freshwater  
44 monitoring. We advocate this community approach to freshwater monitoring to guide management and  
45 conservation, whereby entire communities can be initially surveyed to best inform use of funding and time for  
46 species-specific surveys.

47  
48 **Key-words:** environmental DNA (eDNA), great crested newt, High-Throughput Sequencing  
49 (HTS), metabarcoding, ponds, real-time quantitative PCR (qPCR), *Triturus cristatus*.

50

51

52

## 53 **Introduction**

54

55 Species monitoring has rapidly evolved with the advent of environmental DNA (eDNA) analysis  
56 (Lawson Handley 2015). eDNA analysis allows highly sensitive detection of rare and invasive  
57 species and is increasingly being used for surveys of aquatic species (Thomsen *et al.* 2012; Biggs  
58 *et al.* 2015; Davy, Kidd & Wilson 2015; Smart *et al.* 2016; Evans *et al.* 2017b). This non-  
59 invasive approach uses intra- and extracellular DNA (mucous, skin cells, faeces/urine, gametes,  
60 hair, deceased remains) released into the environment by organisms to survey for species and  
61 assess their distribution (Rees *et al.* 2014b; Lawson Handley 2015; Goldberg *et al.* 2016).  
62 Typically for eDNA analysis, DNA is extracted from environmental samples (water, soil, air)  
63 and analysed using a targeted or passive approach. The targeted approach uses species-specific  
64 primers with conventional PCR (PCR), real-time quantitative PCR (qPCR), or droplet digital  
65 PCR (ddPCR), to determine presence-absence and estimate abundance of single species (Shaw,  
66 Weyrich & Cooper 2016b; Goldberg *et al.* 2016). Conversely, the passive approach uses  
67 conserved primers (i.e. primers with binding sites that are shared across multiple taxa, and flank  
68 a region of highly variable DNA sequence that enables discrimination between these taxa) and  
69 PCR to sequence whole communities with High Throughput Sequencing (HTS), termed eDNA  
70 metabarcoding (Taberlet *et al.* 2012; Shaw *et al.* 2016b; Valentini *et al.* 2016; Deiner *et al.*  
71 2017). Passive eDNA monitoring is particularly attractive to ecologists for biodiversity  
72 assessment as a means to detect entire species assemblages alongside rare or invasive species  
73 (Lacoursière-Roussel *et al.* 2016; Blackman *et al.* 2017). However, this gain in community  
74 understanding may come at the cost of accuracy and sensitivity. Direct comparisons of these two

75 approaches are essential to determine whether they have comparable power and yield similar  
76 results.

77         Although in its relative infancy, eDNA metabarcoding has proven effective for  
78 community biodiversity assessment across a range of taxa in varying environments, particularly  
79 freshwater herpetofauna and fish (Valentini *et al.* 2016; Hänfling *et al.* 2016; Shaw *et al.* 2016a;  
80 Civade *et al.* 2016; Lacoursière-Roussel *et al.* 2016; Lopes *et al.* 2016; Evans *et al.* 2017a; Bálint  
81 *et al.* 2017). However, eDNA metabarcoding is confounded by potential amplification bias  
82 during PCR, preventing capture of all species present in a given area (Kelly *et al.* 2014). Species'  
83 DNA in community samples is also in competition to bind to metabarcoding primers during  
84 PCR, where more common templates are more likely to be amplified. High abundance species  
85 may thus prevent detection of low abundance species, whether by fewer individuals or less DNA  
86 shed, resulting in 'species masking' (Kelly *et al.* 2014; Brandon-Mong *et al.* 2015; Evans *et al.*  
87 2016). eDNA metabarcoding may therefore be less capable of identifying eDNA of rare species  
88 within a community than species-specific qPCR (Evans *et al.* 2016).

89         The sensitivity of eDNA metabarcoding has been evaluated against conventional  
90 biodiversity monitoring methods in freshwater ecosystems (Valentini *et al.* 2016; Hänfling *et al.*  
91 2016; Shaw *et al.* 2016a; Civade *et al.* 2016; Lopes *et al.* 2016; Evans *et al.* 2017a; Bálint *et al.*  
92 2017), yet specific investigations comparing the sensitivity of eDNA metabarcoding and targeted  
93 qPCR are sparse. Similarly, comparisons of qPCR and conventional survey for species  
94 monitoring have included cost projections (Biggs *et al.* 2014; Davy *et al.* 2015; Smart *et al.*  
95 2016; Evans *et al.* 2017b) but cost has not been thoroughly assessed in qPCR and eDNA  
96 metabarcoding comparisons (Lacoursière-Roussel *et al.* 2016; Schneider *et al.* 2016). Schneider  
97 *et al.* (2016) achieved improved detection of Invasive Mosquito Species (IMS) with qPCR and

98 eDNA metabarcoding as opposed to conventional sampling. Although qPCR provided higher  
99 detection probability for two species, metabarcoding achieved comparable results for a third  
100 species, and allowed simultaneous detection of IMS and other taxa in a single sequencing run  
101 without development of multiple species-specific markers. In another study, eDNA  
102 metabarcoding failed to detect wood turtle *Glyptemys insculpta* (LeConte, 1830) in four rivers  
103 where qPCR and conventional visual survey detected the species (Lacoursière-Roussel *et al.*  
104 2016). Amplification of longer fragments during metabarcoding versus qPCR could account for  
105 difference in sensitivity of the two methods, with the shorter qPCR assay being more capable of  
106 detecting heavily degraded DNA (Lacoursière-Roussel *et al.* 2016). Further research is clearly  
107 needed to determine whether these two approaches are comparable.

108         Great crested newt *Triturus cristatus* (Laurenti, 1768) (Fig. 1) is a model organism for  
109 eDNA-based monitoring. *T. cristatus* secrete mucous, breed in water, and produce aquatic eggs  
110 and larvae - all sources of DNA deposition in ponds. The species is rare in parts of the UK and  
111 Europe, and as such all life stages are protected by UK and European legislation (Rees *et al.*  
112 2014a; Buxton *et al.* 2017). eDNA analysis using targeted qPCR has been repeatedly verified  
113 against conventional surveying (bottle trapping, torchlight counts, larval netting, egg searches)  
114 for *T. cristatus* and found to achieve comparable or improved species detection (Thomsen *et al.*  
115 2012; Rees *et al.* 2014a; Biggs *et al.* 2015). eDNA sampling can be undertaken with relative  
116 ease, is cost-efficient (Biggs *et al.* 2014) and can be implemented in large-scale citizen science  
117 monitoring programmes without loss of species detection (Biggs *et al.* 2015). *T. cristatus* is the  
118 first species to be routinely monitored using eDNA in the UK (Natural England 2015) and  
119 targeted eDNA assays are now offered as a commercial service by ecological consultancies. The  
120 targeted eDNA assay is highly effective for *T. cristatus* detection; however, should

121 metabarcoding have comparable sensitivity, this approach would allow detection of *T. cristatus*  
122 alongside pond communities and potentially enable more cost-effective monitoring of entire  
123 ecosystems and ecological hypothesis testing.

124         Here, we perform a large-scale comparison (N = 532 ponds) of eDNA metabarcoding and  
125 targeted qPCR for *T. cristatus* detection to compare method sensitivity. A single primer pair that  
126 is vertebrate specific for mitochondrial DNA (mtDNA) and requires no *a priori* knowledge of  
127 species composition was employed for eDNA metabarcoding. The metabarcoding results were  
128 then compared to results obtained using the standard *T. cristatus* qPCR assay (Biggs *et al.* 2015).  
129 Our hypotheses are: (1) eDNA metabarcoding will give equivalent results to qPCR for *T.*  
130 *cristatus* detection, (2) eDNA metabarcoding sequence read count for *T. cristatus* will increase  
131 as qPCR score (the number of positive qPCR replicates) increases, indicative of eDNA  
132 concentration, and (3) metabarcoding primers will amplify DNA from all taxa equally well and  
133 no bias towards amplification of *T. cristatus* will occur (bias would be indicated by a positive  
134 association between the proportion of *T. cristatus* sequence reads and PCR product  
135 concentration). We also examined cost and investigator effort required by each approach to  
136 determine whether a trade-off between cost, time and amount of data generated exists.

137

138

139

## 140 **Materials and methods**

141

142

### 143 **SAMPLING**

144

145 Samples from 532 ponds distributed across three UK counties (Cheshire, Kent and Lincolnshire)  
146 were analysed for this project. Of these, 508 ponds (ranging from 9 to 9375 m<sup>2</sup>) were sampled as  
147 part of *T. cristatus* surveys through Natural England's Great Crested Newt Evidence  
148 Enhancement Programme. *T. cristatus* egg searches were performed once during the daytime at  
149 506/508 ponds. Any other life stages seen were also recorded. A further 24 ponds were sampled  
150 for eDNA by ecological consultants for private contracts but egg searches were not undertaken.  
151 All water samples were collected using methodology outlined by Biggs *et al.* (2015). Water  
152 samples were then sent to Fera (Natural England) and ADAS (private contracts), where one  
153 eDNA sample per pond was produced and analysed according to laboratory protocols established  
154 by Biggs *et al.* (2015). Details of sampling methodology and laboratory protocols are provided in  
155 Supporting Information: Appendix 1.

156

157

### 158 **TARGETED qPCR FOR *T. CRISTATUS***

159

160 Targeted qPCR was conducted as part of the *T. cristatus* monitoring programmes mentioned  
161 above in Fera and ADAS laboratories during 2015. Both laboratories used a standardised  
162 protocol, which tests for PCR inhibitors and sample degradation prior to testing for *T. cristatus*

163 (Biggs *et al.* 2015). Extracted DNA was amplified by TaqMan probe qPCR using published  
164 primers and probe (Thomsen *et al.* 2012) to amplify an 81 bp fragment of the cytochrome b  
165 gene. For each sample, 12 qPCR replicates were performed and a sample recorded as positive for  
166 *T. cristatus* if one or more qPCR replicates were positive. Following qPCR, the eDNA samples  
167 were placed in storage at -80 °C.

168

169

## 170 METABARCODING OF VERTEBRATE COMMUNITIES

171

172 eDNA samples were stored at -20 °C until PCR amplification. Metabarcoding was performed  
173 using published vertebrate-specific primers (Riaz *et al.* 2011) which amplify a 73-110 bp  
174 fragment of 12S ribosomal RNA gene (rRNA). The assay was first validated *in silico* using  
175 ecoPCR software (Ficetola *et al.* 2010; Bellemain *et al.* 2010) against a custom, phylogenetically  
176 curated reference database for UK vertebrates. Full details of reference database construction are  
177 provided in Supporting Information: Appendix 2. The complete reference database compiled in  
178 GenBank format has been deposited in the dedicated GitHub repository for this study:  
179 [https://github.com/HullUni-bioinformatics/Harper\\_et\\_al\\_2018](https://github.com/HullUni-bioinformatics/Harper_et_al_2018). Parameters set allowed a 50-250  
180 bp fragment and maximum of three mismatches between the primer pair and each sequence in  
181 the reference database. Primers were then validated against tissue DNA extracted from UK  
182 amphibian species (Supporting Information: Appendix 2) having been previously validated *in*  
183 *vitro* for UK fish communities by Hänfling *et al.* (2016). After primer validation, a two-step PCR  
184 protocol was used to construct metabarcoding libraries from the eDNA samples. During the first  
185 PCR, the target region was amplified using metabarcoding primers, comprised of the



186 aforementioned specific locus primer, random hexamers, sequencing primer and pre-adapter  
187 (Illumina 2011). DNA from the cichlid *Rhamphochromis esox* (Boulenger, 1908) was used for  
188 PCR positive controls (six per PCR plate; N = 114), whilst sterile molecular grade water (Fisher  
189 Scientific) substituted template DNA for No Template Controls, NTCs (six per PCR plate; N =  
190 114). In the second PCR, Molecular Identification (MID) tags (unique 8-nucleotide sequences)  
191 and Illumina MiSeq adapter sequences were added to the amplified product. Two independent  
192 libraries were constructed, each containing 266 eDNA samples, 57 NTCs, and 57 positive  
193 controls. Sequencing was performed on an Illumina MiSeq using 2 x 300 bp V3 chemistry at  
194 Fera. The first sequencing run revealed human contamination across samples and in some PCR  
195 controls, therefore reactions prepared for the second sequencing run were sealed with mineral oil  
196 to minimise PCR contamination. Full details of the eDNA metabarcoding workflow are provided  
197 in Supporting Information: Appendix 3.

198

199

## 200 BIOINFORMATIC PROCESSING

201

202 Illumina data was converted from raw sequences to taxonomic assignment using a custom  
203 pipeline for reproducible analysis of metabarcoding data: metaBEAT (metaBarcoding and eDNA  
204 Analysis Tool) v0.8 (<https://github.com/HullUni-bioinformatics/metaBEAT>). Bioinformatic data  
205 processing/analysis largely followed the workflow outlined by Hänfling *et al.* (2016), with minor  
206 modifications (see Supporting Information: Appendix 3 for details). To ensure reproducibility of  
207 analyses, the workflow has been deposited in the GitHub repository.

208

209

## 210 DATA ANALYSIS

211

212 All downstream analyses were performed in the statistical programming environment R v.3.3.2.

213 (R Core Team 2016). Data and R scripts have been deposited in the GitHub repository.

214 Manipulation of the dataset produced by metaBEAT is described in Supporting Information:

215 Appendix 4.

216

217

### 218 *Detection thresholds and contamination*

219

220 At present, there are no standard guidelines for eDNA analysis to indicate minimum number of

221 positive eDNA samples or replicates required to class sites as species positive (Goldberg *et al.*

222 2016). Samples analysed by qPCR in this study were previously considered *T. cristatus* positive

223 if one or more qPCR replicates gave a positive result (Biggs *et al.* 2015). We term this analysis

224 qPCR NT (No Threshold). This inference of species presence is employed across many studies

225 but may not be reliable or reproducible (Goldberg *et al.* 2016). More stringent qPCR thresholds

226 reduced detection sensitivity for palmate newt *Lissotriton vulgaris* (Razoumowsky, 1789) (Smart

227 *et al.* 2016) but may be necessary to ensure consistency and prevent false positives (Rees *et al.*

228 2014b). To facilitate comparison with current qPCR scoring (our NT interpretation) and eDNA

229 metabarcoding, we applied a stringent qPCR threshold of  $\geq 4/12$  positive qPCR replicates to

230 infer species presence, and termed the new analysis qPCR TA (Threshold Applied).

231 The raw eDNA metabarcoding dataset with no detection thresholds applied was termed

232 metabarcoding NT (No Threshold). A second dataset was constructed to reduce the potential for  
233 false positives by application of a species-specific threshold: a species was only classed as  
234 present at a given site if its sequence frequency exceeded a species-specific threshold.  
235 Thresholds for each species were defined by analysing sequence data from PCR positive controls  
236 (N = 114) and identifying the maximum sequence frequency for a given species across all PCR  
237 positive controls (Supporting Information: Table S2). For example, the species-specific false  
238 positive sequence threshold for *T. cristatus* was 0.028% to omit all false detections in the PCR  
239 positive controls. The resultant dataset was termed metabarcoding TA (Threshold Applied).

240 We tested whether mineral oil reduced contamination by analysing the distribution of  
241 positive control sequences (*R. esox*) and human DNA in eDNA samples, and any DNA in NTCs,  
242 across both sequencing runs using binomial generalised linear mixed effects models (GLMMs)  
243 within the R package ‘lme4’ v1.1-12 (Bates *et al.* 2015). The response variable was presence-  
244 absence of contamination and explanatory variables were PCR plate (random effect) and  
245 sequencing run i.e. mineral oil sealed versus non-sealed (fixed effect). Human DNA may be  
246 present in eDNA samples as a real environmental signal or contaminant prior to PCR and thus  
247 may not be a true PCR contaminant. Consequently, contamination in eDNA samples was  
248 examined using several model permutations, where contamination comprised both cichlid and  
249 human DNA, cichlid DNA alone and human DNA alone. An information-theoretic approach  
250 using Akaike’s Information Criteria (AIC) to evaluate model fit was employed, where low AIC  
251 models are more parsimonious than high AIC models (Akaike 1973). Significance of the fixed  
252 effect in the model was tested by a Likelihood Ratio Test (LRT).

253

254

255 *Comparison of eDNA methods for T. cristatus detection*

256

257 We next tested the null hypothesis of no significant difference in sensitivity of qPCR and  
258 metabarcoding. Overall agreement between eDNA metabarcoding and qPCR for *T. cristatus*  
259 detection was measured using Cohen's kappa coefficient (Cohen 1960), following which  
260 Pearson's Chi-squared Test for Independence was used to test equality of *T. cristatus* detection  
261 between eDNA approaches.

262 Previously, Biggs *et al.* (2015) found qPCR score was an inconsistent predictor of *T.*  
263 *cristatus* abundance, where ponds with low scores had low newt counts but high scores did not  
264 correspond to large populations. qPCR score may only be proxy for the amount of DNA present  
265 rather than the number of individuals. The relationship between read count and qPCR score has  
266 not been examined previously, and whether read production is indicative of DNA concentration  
267 remains unknown. We hypothesised samples with higher qPCR score would have increased *T.*  
268 *cristatus* read count. First, the average number of *T. cristatus* reads produced by eDNA  
269 metabarcoding per qPCR score (1-12 out of 12) was calculated. A Spearman Rank Correlation  
270 was then used to test for a relationship between average read count and qPCR score.

271 Following data exploration (see Supporting Information: Appendix 4), a negative  
272 binomial GLMM was used to counter overdispersion and improve model fit. The GLMM  
273 examined read count in relation to qPCR score, accounting for other variables that may affect  
274 metabarcoding signal strength. Variation in *T. cristatus* read count was examined using the  
275 proportion of *T. cristatus* reads within the total number of reads produced for each eDNA sample  
276 as the response variable. Sequencing run and PCR plate were considered random effects and all  
277 other explanatory variables as fixed effects (qPCR score, sample degradation, sample inhibition,

278 post-PCR eDNA concentration). Presence-absence of sample degradation and inhibition was  
279 determined by qPCR in 2015 using methodology outlined by Biggs *et al.* (2015). Model fit was  
280 again evaluated using AIC and significance of fixed effects in the model was tested with  
281 stepwise backward deletion of terms from the model informed by LRTs. All values were bound  
282 in a new data frame and model results plotted for evaluation using the R package ‘ggplot2’ v  
283 2.1.0 (Wickham, 2009).

284

285

### 286 *Cost and investigator effort*

287

288 Cost of materials, and investigator effort and salary (assuming hourly rate of £21.20) were  
289 calculated for eDNA samples but estimates do not include travel to sampling sites, procedural  
290 controls, qPCR standards, or consumables and reagents required for assay optimisation. Time  
291 required to perform PCR for metabarcoding and qPCR was estimated assuming available  
292 machinery to run four PCR plates in parallel and one qPCR plate.

293

294

295

## 296 Results

297

298

### 299 TARGETED qPCR AND EGG SEARCHES

300

301 Targeted qPCR detected *T. cristatus* in 253 (49.80%) samples analysed by Fera (N = 508). Of  
302 255 (50.20%) samples that were negative, one was inhibited and nine were degraded. qPCR and  
303 egg searches produced consistent results for 297 (58.47%) ponds, with 51 (10.04%) positive and  
304 246 (48.43%) negative ponds by both methods. Of the 211 ponds where there was disagreement  
305 between methods, 202 (39.76%) were qPCR positive but negative by egg searches, and 7  
306 (1.38%) were positive with egg searches but qPCR negative. Of 24 samples analysed by ADAS,  
307 12 (50.00%) were qPCR negative and 12 (50.00%) were qPCR positive for *T. cristatus*. No egg  
308 search data were available for these ponds.

309

310

### 311 VERTEBRATE METABARCODING

312

313 The *in silico* and *in vitro* primer validation confirmed that *T. cristatus*, and other native UK  
314 amphibians tested, can be reliably amplified and identified with the chosen assay (Supporting  
315 Information: Appendix 5, Fig. S1). Furthermore, the *in silico* approach showed that the majority  
316 of all UK vertebrates can be amplified (see Appendix 5 for details). Both sequencing runs had  
317 comparable yield and sequencing quality score; summary statistics for each sequencing run and  
318 read counts for taxonomic assignment levels are provided in Supporting Information: Appendix

319 5 (Tables S3, S4). A full summary of sequence read count data is also given in Supporting  
320 Information: Appendix 5 (Table S5). eDNA metabarcoding identified a combined total of 60  
321 species (Supporting Information: Appendix 5, Fig. S2) across both sequencing libraries, with  
322 375,954 and 508,879 sequences assigned to *T. cristatus* from each library. Analyses of overall  
323 pond species compositions inferred by eDNA metabarcoding (Supporting Information: Appendix  
324 5, Fig. S3, Table S6) are reported separately (Harper *et al.* in preparation).

325 All samples (N=532) were sequenced and of 57 samples that did not produce visible PCR  
326 bands, nine generated sequence reads. Notably, the 57 samples were not inhibited or degraded at  
327 time of qPCR. Weak PCR bands were observed in some NTCs therefore all PCR controls were  
328 sequenced (Supporting Information: Appendix 5, Fig. S4). Six NTCs contained *T. cristatus* DNA  
329 but only one exceeded 100 *T. cristatus* reads (307/330 reads). Twelve other sources occurred in  
330 NTCs (Supporting Information: Appendix 5, Table S7); seven occurred in more than one NTC  
331 and eight had high maximum read counts (> 100 reads).

332 Contamination of NTCs (any DNA) and environmental samples (cichlid/human DNA)  
333 was observed (Supporting Information: Appendix 5, Figs. S4, S5, S6). Read counts of NTC  
334 contaminants were reduced between sequencing runs with the addition of mineral oil to PCR  
335 reactions included on the second sequencing run (Supporting Information: Appendix 5, Figs. S4,  
336 S5, S6) but this reduction was not statistically significant (GLMM:  $\chi^2_1 = 2.083$ ,  $F_1 = 1.941$ ,  $P >$   
337  $0.05$ ). Mineral oil did not reduce human DNA signal in environmental samples between  
338 sequencing runs either (GLMM:  $\chi^2_1 = 3.608$ ,  $F_1 = 3.591$ ,  $P > 0.05$ ); however, it did reduce  
339 human DNA in combination with cichlid DNA (GLMM:  $\chi^2_1 = 10.348$ ,  $F_1 = 21.143$ ,  $P < 0.01$ ),  
340 and cichlid DNA contamination alone (GLMM:  $\chi^2_1 = 5.053$ ,  $F_1 = 6.978$ ,  $P < 0.05$ ) of  
341 environmental samples.

342

343

#### 344 eDNA METABARCODING VS qPCR FOR *T. CRISTATUS* DETECTION

345

346 *T. cristatus* detection by metabarcoding NT (34.21%) was less sensitive than qPCR NT (49.81%)  
347 but marginally higher than qPCR TA (32.71%) (N = 532 ponds, Fig. 2). Metabarcoding TA had  
348 lower detection efficiency (28.01%) and failed to detect *T. cristatus* in 116 and 25 ponds where  
349 the species was detected by qPCR NT and qPCR TA respectively. Nonetheless, both molecular  
350 approaches attained higher *T. cristatus* detection than daytime egg searches (11.46%) in 506  
351 ponds where all three approaches were implemented.

352       Overlap between survey methods for positive *T. cristatus* ponds (N = 277), and unique  
353 detections by each method is summarised in Fig. 3. Negative *T. cristatus* ponds (N = 229) are  
354 examined in combination with species positive ponds in Supporting Information: Appendix 5  
355 (Table S8). Each survey method detected the species in ponds where other methods failed.  
356 Despite lower *T. cristatus* detection efficiency, egg searches detected the species in six ponds  
357 where it went undetected by qPCR and metabarcoding. Metabarcoding NT and metabarcoding  
358 TA revealed *T. cristatus* in seven ponds which other methods did not, whilst qPCR NT and  
359 qPCR TA detected *T. cristatus* in 33 ponds unique to other methods. All methods detected *T.*  
360 *cristatus* in 32 ponds, and both metabarcoding and qPCR identified *T. cristatus* in 86 ponds.  
361 Disagreement between molecular methods was more likely when samples were positive rather  
362 than negative by qPCR. Without thresholds, 39.25% of qPCR positive ponds (N = 265) were  
363 negative by metabarcoding, but 7.87% of qPCR negative ponds (N = 267) were positive by  
364 metabarcoding. With thresholds, 29.31% of qPCR positive ponds (N = 174) were negative by



365 metabarcoding, whereas 7.26% of qPCR negative ponds (N = 358) were positive by  
366 metabarcoding.

367 Agreement between eDNA approaches is summarised in Table 1. Agreement was  
368 strongest between eDNA approaches when the qPCR detection threshold was applied,  
369 irrespective of whether the metabarcoding detection threshold was applied. Metabarcoding (NT  
370 or TA) and qPCR TA did not significantly differ in their detection of *T. cristatus* (Table 1). An  
371 identical positive correlation was observed between qPCR score and the average number of *T.*  
372 *cristatus* reads obtained for samples belonging to each qPCR score ( $r_s = 0.648$ ,  $df = 11$ ,  $P <$   
373  $0.05$ ), regardless of threshold application to the metabarcoding data. Despite some inconsistency  
374 across qPCR scores, samples with a higher qPCR score generally had more *T. cristatus* reads,  
375 supportive of a relationship between metabarcoding and abundance of eDNA from single  
376 species. Notably, metabarcoding produced *T. cristatus* reads for qPCR NT and qPCR TA  
377 negative samples, but the *T. cristatus* metabarcoding signal of these (qPCR NT<sub>negative</sub> = 2639  
378 reads max., qPCR TA<sub>negative</sub> = 3075 reads max.) was much lower than samples with higher qPCR  
379 score (max. 65,325 reads; Supporting Information: Appendix 5). Further examination of the  
380 relationship between qPCR score and metabarcoding TA revealed qPCR score and post-PCR  
381 eDNA concentration of samples also influenced the proportion of *T. cristatus* reads i.e. relative  
382 *T. cristatus* sequence read production (Table 2). A significant positive relationship was observed  
383 between qPCR score and the proportion of *T. cristatus* reads within total reads per sample ( $P <$   
384  $0.001$ ) (Fig. 4a). Conversely, post-PCR eDNA concentration had a significant negative influence  
385 on the proportion of *T. cristatus* reads ( $P < 0.001$ ), where read proportion decreased as post-PCR  
386 eDNA concentration increased (Fig. 4b).

387

388

## 389 COMPARISON OF METHOD COST AND INVESTIGATOR EFFORT

390

391 Cost and investigator effort for both eDNA approaches were comparable. Metabarcoding was  
392 marginally more expensive (£3 per pond) than qPCR, but used 1 day less of investigator effort. A  
393 full breakdown of expenditure per pond is given in Supporting Information: Appendix 5 (Table  
394 S9) and summarised in Fig. 5.

395

396

397

## 398 **Discussion**

399

400 We have demonstrated eDNA metabarcoding is a highly sensitive tool for monitoring *T.*  
401 *cristatus* alongside the wider biological community, corroborating other comparisons of eDNA  
402 metabarcoding and qPCR for single-species monitoring (Lacoursière-Roussel *et al.* 2016;  
403 Schneider *et al.* 2016). Despite reduction in single-species detection, eDNA metabarcoding  
404 revealed a wealth of biodiversity information and could enable more effective freshwater  
405 monitoring networks and better understanding of community structure and ecosystem function  
406 alongside *T. cristatus* monitoring (Biggs, von Fumetti & Kelly-Quinn 2016). However, both  
407 eDNA approaches have advantages and drawbacks which must be considered for design and  
408 implementation of biodiversity monitoring programmes.

409

410

## 411 SINGLE-SPECIES DETECTION BY qPCR AND METABARCODING

412

413 A direct comparison of sensitivity between qPCR and metabarcoding is not straightforward:  
414 stochasticity in qPCR largely occurs during amplification (volume of template DNA and  
415 technical replication), whereas stochastic variation during metabarcoding arises through PCR  
416 amplification and sequencing (depth and replication) (Kelly *et al.* 2014; Thomsen *et al.* 2016;  
417 Deiner *et al.* 2017). In our study, 12 independent qPCR replicates were performed for each  
418 sample but due to limited resources, metabarcoding was based on three pooled PCR replicates  
419 which were sequenced once only. Therefore, to enable a fair comparison between methods in  
420 terms of PCR effort, a threshold of  $\geq 4/12$  positive replicates (qPCR TA) was applied to the  
421 qPCR data. Detection sensitivity was most similar between methods with the qPCR threshold  
422 and without the metabarcoding threshold. Both eDNA metabarcoding and qPCR displayed  
423 reduced *T. cristatus* detection when thresholds were applied; although, this may reflect reduced  
424 false positive detections rather than decreased sensitivity. Lower sensitivity of the eDNA  
425 metabarcoding approach used here may also stem from sample degradation during long-term  
426 storage. The samples used were stored for more than 12 months at -80 °C before metabarcoding.  
427 However, long-term storage and continual freeze-thawing of samples may allow aggregation of  
428 inhibitory substances which impair PCR amplification and cause false negatives (Takahara,  
429 Minamoto & Doi 2015).

430 Despite lower sensitivity, strength of eDNA signal produced by metabarcoding was  
431 correlated with that of qPCR, where both *T. cristatus* average read count and read proportion  
432 broadly increased with qPCR score of eDNA samples. The correlation was inconsistent though,  
433 where high average or proportional *T. cristatus* read count did not always correspond to high

434 qPCR score. Biggs *et al.* (2015) also found a variable positive association between qPCR and *T.*  
435 *cristatus* counts, where high qPCR score did not always correlate with high counts. Quantitative  
436 data on eDNA concentration are needed to examine the performance of each eDNA approach in  
437 relation to the amount of eDNA present, and whether these tools can reliably estimate species  
438 abundance. This data can be obtained with highly sensitive qPCR assays, and inclusion of  
439 internal DNA standards in sequencing runs for metabarcoding (Ushio *et al.* 2017). Nonetheless,  
440 our results suggest performance of metabarcoding and qPCR are linked and influenced by  
441 external factors. Evans *et al.* (2016) suggested the relative abundance and biomass of a species  
442 interact to exert a combined effect on eDNA production rate and subsequent metabarcoding  
443 detection. The abundance, biomass, and distribution of *T. cristatus* (Biggs *et al.* 2015), as well as  
444 shedding rate, environmental factors, and eDNA transport (Goldberg *et al.* 2016; Buxton *et al.*  
445 2017), may all influence detection and concentration of eDNA, and inferences made using qPCR  
446 and metabarcoding.

447         The comparison between qPCR and metabarcoding must also be examined in context of  
448 the sequencing effort. Here, we sequenced a large number of samples (380 including PCR  
449 controls) per run to provide a realistic cost scenario for routine monitoring. Yet, metabarcoding  
450 sensitivity would likely improve with an increase in read depth per sample (Kelly *et al.* 2014). In  
451 order to directly compare eDNA signal production by these approaches, it may be necessary to  
452 perform sequencing replicates to verify true positives where rare species are expected and  
453 generate an “eDNA metabarcoding score” system similar to qPCR (Brandon-Mong *et al.* 2015;  
454 Port *et al.* 2016; Civade *et al.* 2016; Thomsen *et al.* 2016). PCR and sequencing replication in  
455 metabarcoding may enhance species detection probability through improved amplification of low  
456 abundance or highly degraded DNA (Ficetola *et al.* 2015; Port *et al.* 2016) that is readily

457 amplified by qPCR (Lacoursière-Roussel *et al.* 2016).

458         Similarly, sequencing of independent biological replicates, opposed to pseudoreplicates  
459 from a single water sample, may improve detection and minimise false negatives produced by  
460 eDNA metabarcoding (Andruszkiewicz *et al.* 2017; Bálint *et al.* 2017). Currently, 90 mL (6 x 15  
461 mL sampled from 600 mL) water is sampled during *T. cristatus* eDNA survey, followed by  
462 ethanol precipitation (Biggs *et al.* 2015). While this may be appropriate for highly-sensitive  
463 targeted qPCR, larger water volumes and filtration may be required to capture eDNA from less  
464 abundant vertebrates and characterise community diversity (Shaw *et al.* 2016b). Additionally,  
465 eDNA from different species, and individuals within species, can be unevenly distributed  
466 throughout water bodies and may be concentrated in particular areas (Biggs *et al.* 2015; Hänfling  
467 *et al.* 2016; Evans *et al.* 2017a), thus sampling strategies must be carefully designed to ensure  
468 eDNA samples are representative of biodiversity present.

469         Metabarcoding assays are also susceptible to problems from taxon bias, DNA swamping  
470 and bioinformatics related problems (Taberlet *et al.* 2012; Kelly *et al.* 2014; Shaw *et al.* 2016b).  
471 Potential reduction in sensitivity of passive community sequencing versus targeted qPCR may  
472 relate to the performance of metabarcoding primers for target species. During metabarcoding,  
473 DNA from rare species may be masked by highly abundant species (Schneider *et al.* 2016), or  
474 under-represented due to disproportionate eDNA shedding rates across species and preferential  
475 amplification of other species (Kelly *et al.* 2014). PCR-free workflows (i.e. shotgun sequencing)  
476 eliminate this bias through indiscriminate sequencing; however, this is unsuitable for  
477 conservation projects with target species as a mass of uninformative data are produced, and too  
478 costly for routine monitoring schemes (Shaw *et al.* 2016b; Valentini *et al.* 2016). We found *T.*  
479 *cristatus* read proportion was negatively associated with post-PCR concentration of eDNA

480 samples. As a positive relationship was not observed, this would suggest PCR amplification with  
481 our selected marker and primers was not biased toward our focal species. However, we cannot  
482 conclude that our metabarcoding assay was free of primer bias as post-PCR concentration of  
483 eDNA samples can be influenced by PCR stochasticity.

484 Multiple markers (e.g. COI, CytB, 12S, 16S) are increasingly used in eDNA  
485 metabarcoding to cast a wider net of species detection and minimise primer bias (Evans *et al.*  
486 2016, 2017a; Valentini *et al.* 2016; Hänfling *et al.* 2016; Shaw *et al.* 2016a). Using markers from  
487 both mitochondrial and nuclear genes may reduce bias associated with specific genes or primers,  
488 and provide greater taxonomic resolution (Kelly *et al.* 2014). Furthermore, multiple markers of  
489 different lengths may enhance understanding of eDNA persistence and state, and species  
490 location. Long barcodes bind to stable DNA that has been recently deposited by species  
491 (Hänfling *et al.* 2016), and may reduce false negatives whilst increasing taxonomic resolution  
492 and accuracy (Kelly *et al.* 2014; Valentini *et al.* 2016; Shaw *et al.* 2016a). In contrast, short  
493 barcodes (such as 12S used here) challenge sequencers and bioinformatics tools (Taberlet *et al.*  
494 2012; Shaw *et al.* 2016a), but readily amplify short, degraded DNA fragments that persist longer  
495 and possibly disperse further in water bodies, improving probability of detection (Hänfling *et al.*  
496 2016). It is possible that metabarcoding detection rates could be improved by using group-  
497 specific metabarcoding primers for amphibians, such as the ‘batra’ set recently designed by  
498 Valentini *et al.* (2016). More specific primers could increase relative coverage of *T. cristatus*,  
499 providing more comparable detection rates to qPCR. This is worth investigating, but with the  
500 caveat that group-specific primers obviously restrict the biodiversity information that can be  
501 gained from an ecosystem.

502

503

## 504 FALSE NEGATIVES

505

506 This study did not aim to evaluate sensitivity of molecular methods against standard *T. cristatus*  
507 survey methodologies. Egg searches were used to detect false negatives produced by qPCR and  
508 metabarcoding and in doing so, revealed some interesting results. Biggs *et al.* (2015) previously  
509 demonstrated qPCR had higher detection rate than egg searches (as well as torchlight, netting,  
510 and bottle trapping), but here we show this also holds true for metabarcoding. Importantly,  
511 absence of eggs does not infer absence of adults, and this method is highly dependent on weather  
512 conditions and water clarity (Rees *et al.* 2014a; Biggs *et al.* 2015). Despite considerably higher  
513 detection rate of both eDNA approaches, eggs were recorded in a small number of ponds that  
514 were eDNA negative. eDNA analysis can incorrectly infer absence or low abundance of species  
515 if inhibition or interference from non-target DNA has occurred (Goldberg *et al.* 2016).  
516 Alternatively, eDNA false negatives may have been a by-product of sampling strategy and effort  
517 for *T. cristatus*. Larger water volumes and/or more biological replication instead of  
518 pseudoreplication (established *T. cristatus* eDNA sampling strategy) may improve detection  
519 (Lopes *et al.* 2016; Andruszkiewicz *et al.* 2017; Bálint *et al.* 2017). All methods revealed *T.*  
520 *cristatus* in ponds where other approaches failed, emphasising that these species monitoring tools  
521 are complementary and should be used in combination to achieve maximum detection  
522 probability. However, integrative strategies combining molecular and conventional tools are  
523 often not cost-efficient for most applications.

524

525

526 FALSE POSITIVES

527

528 False positives may arise from field contamination and eDNA transport in the environment -  
529 particularly by waterfowl (Shaw *et al.* 2016a). eDNA is retained by predators, discarded in  
530 faeces, and transported by anthropogenic activity, combined with natural water currents and flow  
531 (Hänfling *et al.* 2016). In the laboratory, PCR-accumulated and sequencing error, including  
532 primer mismatch (Andersen *et al.* 2012) and ‘tag jumps’ (Schnell, Bohmann & Gilbert 2015),  
533 can induce misassignment leading to false positives, cross-contamination between samples, or  
534 laboratory contamination (Andruszkiewicz *et al.* 2017).

535 False positives can be modelled and estimated using Site Occupancy Modelling of  
536 metabarcoding data (Ficetola *et al.* 2015) or risk of false positives minimised using a sequencing  
537 threshold i.e. the number of sequence reads required for a sample to be species positive  
538 (Hänfling *et al.* 2016; Civade *et al.* 2016; Evans *et al.* 2017a). However, such thresholds can  
539 reduce detection of rare species, a primary goal of this study, and may fail where false and true  
540 positives occur at similar frequency (Hänfling *et al.* 2016). Instead, we calculated species-  
541 specific sequence thresholds to more accurately control for false positives in our dataset without  
542 compromising *T. cristatus* detection.

543 In our study, human DNA occurred at high frequency and abundance; this may have been  
544 a true environmental signal from pond water, or real contaminant as encountered in other  
545 metabarcoding research (Port *et al.* 2016; Valentini *et al.* 2016; Thomsen *et al.* 2016). Blocking  
546 primers can prevent amplification of abundant non-target DNA like human (Valentini *et al.*  
547 2016) but may fail (Thomsen *et al.* 2016) or prevent amplification of target taxa (Port *et al.*  
548 2016). Alongside human, other aquatic and terrestrial vertebrate DNA occurred at high



549 frequency in NTCs, although these were not removed by addition of mineral oil. An even stricter  
550 forensic laboratory set-up, such as that employed for ancient DNA (aDNA), should be adopted to  
551 ensure data robustness. Positive and negative controls should be included at each stage of  
552 metabarcoding workflows to monitor contamination (Deiner *et al.* 2017). However, preventive  
553 measures inevitably increase research cost and some degree of contamination is unavoidable in  
554 metabarcoding (Kelly *et al.* 2014; Brandon-Mong *et al.* 2015; Port *et al.* 2016; Thomsen *et al.*  
555 2016).

556 Our results also highlight the importance and impact of qPCR thresholds when inferring  
557 species presence-absence. Similar to Smart *et al.* (2016), we found a stringent qPCR threshold  
558 reduced detection sensitivity. As yet, no guidance exists to indicate how many samples or  
559 replicates must be positive to class a site as species-positive (Goldberg *et al.* 2016; Smart *et al.*  
560 2016) but clearly this must be addressed to improve standardisation and reproducibility of eDNA  
561 research. Importantly, less stringent thresholds (and false positives inherent to these) are  
562 somewhat precautionary and may better protect *T. cristatus* by preventing development.  
563 Therefore, whilst reduction or removal of false positives is desirable, detection thresholds must  
564 not compromise protection of threatened species either. Until a suitable threshold can be  
565 established, it may be more appropriate to re-analyse samples which yield one positive qPCR  
566 replicate to prevent false positives (Rees *et al.* 2014b; Goldberg *et al.* 2016).

567

568

## 569 COST AND INVESTIGATOR EFFORT

570

571 Cost efficiency combined with the overarching aim of a monitoring or conservation programme

572 should always be considered. We found eDNA metabarcoding was more costly than qPCR but  
573 both approaches required similar investigator effort. qPCR scales to the number of samples being  
574 processed (Schneider *et al.* 2016) whereas metabarcoding has fixed costs including reagent kit  
575 for HTS platform (Bálint *et al.* 2017). eDNA metabarcoding becomes more cost-efficient as  
576 more samples are processed (Bálint *et al.* 2017) but fewer replicates would reduce qPCR cost  
577 (Davy *et al.* 2015; Smart *et al.* 2016). Cost of eDNA monitoring is influenced by sample size,  
578 methods, replication, laboratory, statistical power and occupancy modelling (Davy *et al.* 2015;  
579 Evans *et al.* 2017b). Consequently, cost is proportional to project requirements (Davy *et al.*  
580 2015) and will vary depending on choice of qPCR or metabarcoding workflow. Whilst qPCR is  
581 established technology that has reached its price ceiling, HTS is relatively new technology and  
582 prices will continue to drop, meaning higher sample throughput and more technical replication  
583 will be possible. We therefore argue that metabarcoding will become more cost-efficient in the  
584 long-term, providing more data at lower cost and comparable sensitivity to qPCR. However,  
585 where samples cannot be processed in large batches, qPCR may retain cost-efficiency.

586

587

588

## 589 **Conclusion**

590

591 eDNA metabarcoding holds promise for holistic biodiversity monitoring of freshwater ponds as  
592 opposed to targeted qPCR for flagship or indicator species such as *T. cristatus*. Metabarcoding  
593 can reveal entire species assemblages from environmental samples without prior ecosystem  
594 information, and provide broad-scale distribution data for multiple species simultaneously.

595 Nonetheless, the method at present appears to be less sensitive than qPCR for single-species  
596 monitoring, and species detection by molecular and conventional methods was incongruent.  
597 Comprehensive study of the influence of water volume, eDNA capture and extraction method,  
598 and sample storage on single-species and community detection in lentic and lotic systems is  
599 required. Minimising the risk of false positives and contamination remains a pressing issue in  
600 metabarcoding, and standard contamination measures (Goldberg *et al.* 2016) may be insufficient  
601 for analysis of vertebrate assemblages. Currently, cost and investigator effort required for  
602 metabarcoding and qPCR are broadly equivalent, but reduced sequencing costs may level the  
603 playing field. We conclude that eDNA metabarcoding is not yet a replacement for targeted qPCR  
604 and conventional survey but rather another tool in the ecologist toolbox. Ultimately, choice of  
605 monitoring tool(s) is specific to aims of each conservation project. At present, qPCR retains  
606 sensitivity for *T. cristatus* populations of all sizes, regardless of sample number processed. Under  
607 a realistic conservation monitoring scenario, where funding is limited and samples must be  
608 processed in large batches, metabarcoding may suffer from false negatives due to reduced  
609 sequencing depth and replication. However, in many cases, the biodiversity information  
610 generated by this approach, and its implications for community ecology and conservation, will  
611 eclipse lower sensitivity. This passive screening approach would be most effective for initial  
612 survey of water bodies to generate broad-scale multi-species distribution data. This holistic data  
613 can then inform best use of funding and time for targeted species-specific survey.

614

615

616

617 **Acknowledgements**

618

619 This work was funded by University of Hull. We would like to thank Jennifer Hodgetts (Fera)  
620 for assisting with sample collection and data dissemination, and Jianlong Li (University of Hull)  
621 for primer design and advice on laboratory protocols. Furthermore, Barbara Mabel, Elizabeth  
622 Kilbride (University of Glasgow), Andrew Buxton and Richard Griffiths (DICE/University of  
623 Kent) provided tissue samples for primer validation and Sanger sequencing to supplement the  
624 reference database.

625

626

627

628 **Author contributions**

629

630 B.H., L.R.H., L.L.H and N.B. conceived and designed the study. H.C.R., K.C.G., and N.B.  
631 contributed samples for processing. H.C.R. performed extractions under licence from Natural  
632 England and qPCR for eDNA samples from private contracts at The University of Nottingham.  
633 N.B. performed qPCR for eDNA samples from Natural England's Great Crested Newt Evidence  
634 Enhancement Program. L.R.H. performed remaining laboratory work and analysed the data.  
635 I.P.A. and E.L. offered advice on and supervised sequencing. C.H. assisted with bioinformatics  
636 analysis. P.B. and S.P. contributed datasets for analysis. L.R.H. wrote the manuscript, which all  
637 authors revised.

638

639

640

641 **Data accessibility**

642

643 Raw sequence reads have been archived on the NCBI Sequence Read Archive. R scripts and  
644 corresponding data are deposited in the dedicated GitHub repository:  
645 [https://github.com/HullUni-bioinformatics/Harper et al 2018](https://github.com/HullUni-bioinformatics/Harper_et_al_2018).

646

647

648

649 **References**

- 650 Akaike, H. (1973) Maximum likelihood identification of Gaussian autoregressive moving  
651 average models. *Biometrika*, **60**, 255-265.
- 652 Andersen, K., Bird, K.L., Rasmussen, M., Haile, J., Breuning-Madsen, H., Kjær, K.H., Orlando,  
653 L., Gilbert, M.T.P. & Willerslev, E. (2012) Meta-barcoding of “dirt” DNA from soil reflects  
654 vertebrate biodiversity. *Molecular Ecology*, **21**, 1966–1979.
- 655 Andruszkiewicz, E.A., Starks, H.A., Chavez, F.P., Sassoubre, L.M., Block, B.A. & Boehm, A.B.  
656 (2017) Biomonitoring of marine vertebrates in Monterey Bay using eDNA metabarcoding.  
657 *PLoS One*, **12**, e0176343.
- 658 Bálint, M., Nowak, C., Márton, O., Pauls, S., Wittwer, C., Aramayo, J.L., Schulze, A.,  
659 Chambert, T., Cocchiararo, B. & Jansen, M. (2017) Twenty-five species of frogs in a liter of  
660 water: eDNA survey for exploring tropical frog diversity. *bioRxiv*, 176065.
- 661 Bates, D., Maechler, M., Bolker, B. & Walker, S. (2015) lme4: Linear mixed-effects models  
662 using Eigen and S4, 2014. *R package version*.
- 663 Bellemain, E., Carlsen, T., Brochmann, C., Coissac, E., Taberlet, P. & Kausrud, H. (2010) ITS  
664 as an environmental DNA barcode for fungi: an in silico approach reveals potential PCR  
665 biases. *BMC Microbiology*, **10**, 189.
- 666 Biggs, J., Ewald, N., Valentini, A., Gaboriaud, C., Dejean, T., Griffiths, R.A., Foster, J.,  
667 Wilkinson, J.W., Arnell, A., Brotherton, P., Williams, P. & Dunn, F. (2015) Using eDNA to  
668 develop a national citizen science-based monitoring programme for the great crested newt  
669 (*Triturus cristatus*). *Biological Conservation*, **183**, 19–28.

- 670 Biggs, J., Ewald, N., Valentini, A., Gaboriaud, C. & Griffiths, R.A. (2014) Analytical and  
671 methodological development for improved surveillance of the Great Crested Newt. *Defra*  
672 *Project WC1067*.
- 673 Biggs, J., von Fumetti, S. & Kelly-Quinn, M. (2016) The importance of small waterbodies for  
674 biodiversity and ecosystem services: implications for policy makers. *Hydrobiologia*, 1–37.
- 675 Blackman, R.C., Constable, D., Hahn, C., Sheard, A.M., Durkota, J., Hänfling, B. & Handley,  
676 L.L. (2017) Detection of a new non-native freshwater species by DNA metabarcoding of  
677 environmental samples—first record of *Gammarus fossarum* in the UK. *Aquatic Invasions*,  
678 **2**, 177-189.
- 679 Brandon-Mong, G.-J., Gan, H.-M., Sing, K.-W., Lee, P.-S., Lim, P.-E. & Wilson, J.-J. (2015)  
680 DNA metabarcoding of insects and allies: an evaluation of primers and pipelines. *Bulletin of*  
681 *Entomological Research*, **105**, 717–727.
- 682 Buxton, A.S., Groombridge, J.J., Zakaria, N.B. & Griffiths, R.A. (2017) Seasonal variation in  
683 environmental DNA in relation to population size and environmental factors. *Scientific*  
684 *Reports*, **7**, 46294.
- 685 Civade, R., Dejean, T., Valentini, A., Roset, N., Raymond, J.-C., Bonin, A., Taberlet, P. & Pont,  
686 D. (2016) Spatial Representativeness of Environmental DNA Metabarcoding Signal for Fish  
687 Biodiversity Assessment in a Natural Freshwater System. *PLoS One*, **11**, e0157366.
- 688 Cohen, J. (1960) A Coefficient of Agreement for Nominal Scales. *Educational and*  
689 *Psychological Measurement*, **20**, 37–46.
- 690 Davy, C.M., Kidd, A.G. & Wilson, C.C. (2015) Development and Validation of Environmental  
691 DNA (eDNA) Markers for Detection of Freshwater Turtles. *PLoS One*, **10**, e0130965.
- 692 Deiner, K., Bik, H.M., Mächler, E., Seymour, M., Lacoursière-Roussel, A., Altermatt, F., Creer,  
693 S., Bista, I., Lodge, D.M., de Vere, N., Pfrender, M.E. & Bernatchez, L. (2017)  
694 Environmental DNA metabarcoding: transforming how we survey animal and plant  
695 communities. *Molecular Ecology*, 1-24.
- 696 Evans, N.T., Olds, B.P., Renshaw, M.A., Turner, C.R., Li, Y., Jerde, C.L., Mahon, A.R.,  
697 Pfrender, M.E., Lamberti, G.A. & Lodge, D.M. (2016) Quantification of mesocosm fish and  
698 amphibian species diversity via environmental DNA metabarcoding. *Molecular Ecology*  
699 *Resources*, **16**, 29–41.
- 700 Evans, N.T., Li, Y., Renshaw, M.A., Olds, B.P., Deiner, K., Turner, C.R., Jerde, C.L., Lodge,  
701 D.M., Lamberti, G.A. & Pfrender, M.E. (2017a) Fish community assessment with eDNA  
702 metabarcoding: effects of sampling design and bioinformatic filtering. *Canadian Journal of*  
703 *Fisheries and Aquatic Sciences*, **74**, 1362-1374.
- 704 Evans, N.T., Shirey, P.D., Wieringa, J.G., Mahon, A.R. & Lamberti, G.A. (2017b) Comparative  
705 Cost and Effort of Fish Distribution Detection via Environmental DNA Analysis and  
706 Electrofishing. *Fisheries*, **42**, 90–99.
- 707 Ficetola, G.F., Coissac, E., Zundel, S., Riaz, T., Shehzad, W., Bessièrè, J., Taberlet, P. &  
708 Pompanon, F. (2010) An *In silico* approach for the evaluation of DNA barcodes. *BMC*  
709 *Genomics*, **11**, 434.

- 710 Ficetola, G.F., Pansu, J., Bonin, A., Coissac, E., Giguët-Covex, C., De Barba, M., Gielly, L.,  
711 Lopes, C.M., Boyer, F., Pompanon, F., Rayé, G. & Taberlet, P. (2015) Replication levels,  
712 false presences and the estimation of the presence/absence from eDNA metabarcoding data.  
713 *Molecular Ecology Resources*, **15**, 543–556.
- 714 Goldberg, C.S., Turner, C.R., Deiner, K., Klymus, K.E., Thomsen, P.F., Murphy, M.A., Spear,  
715 S.F., McKee, A., Oyler-McCance, S.J., Cornman, R.S., Laramie, M.B., Mahon, A.R., Lance,  
716 R.F., Pilliod, D.S., Strickler, K.M., Waits, L.P., Fremier, A.K., Takahara, T., Herder, J.E. &  
717 Taberlet, P. (2016) Critical considerations for the application of environmental DNA  
718 methods to detect aquatic species. *Methods in Ecology and Evolution*, **7**, 1299–1307.
- 719 Hänfling, B., Lawson Handley, L., Read, D.S., Hahn, C., Li, J., Nichols, P., Blackman, R.C.,  
720 Oliver, A. & Winfield, I.J. (2016) Environmental DNA metabarcoding of lake fish  
721 communities reflects long-term data from established survey methods. *Molecular Ecology*,  
722 **25**, 3101–3119.
- 723 Kelly, R.P., Port, J.A., Yamahara, K.M. & Crowder, L.B. (2014) Using environmental DNA to  
724 census marine fishes in a large mesocosm. *PLoS One*, **9**, e86175.
- 725 Lacoursière-Roussel, A., Dubois, Y., Normandeau, E. & Bernatchez, L. (2016) Improving  
726 herpetological surveys in eastern North America using the environmental DNA method.  
727 *Genome*, **59**, 991–1007.
- 728 Lawson Handley, L. (2015) How will the “molecular revolution” contribute to biological  
729 recording? *Biological Journal of the Linnean Society*, **115**, 750–766.
- 730 Lopes, C.M., Sasso, T., Valentini, A., Dejean, T., Martins, M., Zamudio, K.R. & Haddad, C.F.B.  
731 (2016) eDNA metabarcoding: a promising method for anuran surveys in highly diverse  
732 tropical forests. *Molecular Ecology Resources*, **17**, 904–914.
- 733 Natural England (2015) Great crested newts: surveys and mitigation for development projects.  
734 Available at: [https://www.gov.uk/guidance/great-crested-newts-surveys-and-mitigation-for-](https://www.gov.uk/guidance/great-crested-newts-surveys-and-mitigation-for-development-projects)  
735 [development-projects](https://www.gov.uk/guidance/great-crested-newts-surveys-and-mitigation-for-development-projects) [accessed: 7<sup>th</sup> November 2017].
- 736 Port, J.A., O’Donnell, J.L., Romero-Maraccini, O.C., Leary, P.R., Litvin, S.Y., Nickols, K.J.,  
737 Yamahara, K.M. & Kelly, R.P. (2016) Assessing vertebrate biodiversity in a kelp forest  
738 ecosystem using environmental DNA. *Molecular Ecology*, **25**, 527–541.
- 739 Rees, H.C., Bishop, K., Middleditch, D.J., Patmore, J.R.M., Maddison, B.C. & Gough, K.C.  
740 (2014a) The application of eDNA for monitoring of the Great Crested Newt in the UK.  
741 *Ecology and Evolution*, **4**, 4023–4032.
- 742 Rees, H.C., Maddison, B.C., Middleditch, D.J., Patmore, J.R.M. & Gough, K.C. (2014b)  
743 REVIEW: The detection of aquatic animal species using environmental DNA—a review of  
744 eDNA as a survey tool in ecology. *Journal of Applied Ecology*, **51**, 1450–1459.
- 745 Riaz, T., Shehzad, W., Viari, A., Pompanon, F., Taberlet, P. & Coissac, E. (2011) ecoPrimers:  
746 inference of new DNA barcode markers from whole genome sequence analysis. *Nucleic*  
747 *Acids Research*, **39**, e145.

- 748 Schneider, J., Valentini, A., Dejean, T., Montarsi, F., Taberlet, P., Glaizot, O. & Fumagalli, L.  
749 (2016) Detection of Invasive Mosquito Vectors Using Environmental DNA (eDNA) from  
750 Water Samples. *PLoS One*, **11**, e0162493.
- 751 Schnell, I.B., Bohmann, K. & Gilbert, M.T.P. (2015) Tag jumps illuminated--reducing sequence-  
752 to-sample misidentifications in metabarcoding studies. *Molecular Ecology Resources*, **15**,  
753 1289–1303.
- 754 Shaw, J.L.A., Clarke, L.J., Wedderburn, S.D., Barnes, T.C., Weyrich, L.S. & Cooper, A. (2016a)  
755 Comparison of environmental DNA metabarcoding and conventional fish survey methods in  
756 a river system. *Biological Conservation*, **197**, 131–138.
- 757 Shaw, J.L.A., Weyrich, L. & Cooper, A. (2016b) Using environmental (e)DNA sequencing for  
758 aquatic biodiversity surveys: a beginner's guide. *Marine and Freshwater Research*, 1-14.
- 759 Smart, A.S., Weeks, A.R., van Rooyen, A.R., Moore, A., McCarthy, M.A. & Tingley, R. (2016)  
760 Assessing the cost-efficiency of environmental DNA sampling. *Methods in Ecology and*  
761 *Evolution*, **7**, 1291–1298.
- 762 Taberlet, P., Coissac, E., Pompanon, F., Brochmann, C. & Willerslev, E. (2012) Towards next-  
763 generation biodiversity assessment using DNA metabarcoding. *Molecular Ecology*, **21**,  
764 2045–2050.
- 765 Takahara, T., Minamoto, T. & Doi, H. (2015) Effects of sample processing on the detection rate  
766 of environmental DNA from the Common Carp (*Cyprinus carpio*). *Biological Conservation*,  
767 **183**, 64–69.
- 768 Thomsen, P.F., Iversen, L.L., Wiuf, C., Rasmussen, M., Gilbert, M.T.P., Orlando, L. &  
769 Willerslev, E. (2012) Monitoring endangered freshwater biodiversity using environmental  
770 DNA. *Molecular Ecology*, **21**, 2565–2573.
- 771 Thomsen, P.F., Møller, P.R., Sigsgaard, E.E., Knudsen, S.W., Jørgensen, O.A. & Willerslev, E.  
772 (2016) Environmental DNA from Seawater Samples Correlate with Trawl Catches of  
773 Subarctic, Deepwater Fishes. *PLoS One*, **11**, e0165252.
- 774 Ushio, M., Murakami, H., Masuda, R., Sado, T., Miya, M., Sakurai, S., Yamanaka, H.,  
775 Minamoto, T. & Kondoh, M. (2017) Quantitative monitoring of multispecies fish  
776 environmental DNA using high-throughput sequencing. *BioRxiv*, 113472.
- 777 Valentini, A., Taberlet, P., Miaud, C., Civade, R., Herder, J., Thomsen, P.F., Bellemain, E.,  
778 Besnard, A., Coissac, E., Boyer, F., Gaboriaud, C., Jean, P., Poulet, N., Roset, N., Copp,  
779 G.H., Geniez, P., Pont, D., Argillier, C., Baudoin, J.-M., Peroux, T., Crivelli, A.J., Olivier,  
780 A., Acqueberge, M., Le Brun, M., Møller, P.R., Willerslev, E. & Dejean, T. (2016) Next-  
781 generation monitoring of aquatic biodiversity using environmental DNA metabarcoding.  
782 *Molecular Ecology*, **25**, 929–942.
- 783



784 **Table 1.** Summary of analyses testing for agreement between eDNA approaches, with threshold applied (TA) and  
785 no threshold (NT), for *T. cristatus* detection. Cohen's kappa coefficient (k) represents strength of agreement  
786 between methods (1 = 100%). Pearson's Chi-squared Test for Independence tested whether methods significantly  
787 differed for *T. cristatus* detection.

788

| Comparison                  | Probability of observed agreement | Probability of expected agreement | k    | Overall agreement | $\chi^2$ | d.f. | P       |
|-----------------------------|-----------------------------------|-----------------------------------|------|-------------------|----------|------|---------|
| Metabarcoding NT<br>qPCR NT | 0.77                              | 0.50                              | 0.53 | Moderate          | 25.94    | 1    | < 0.001 |
| Metabarcoding TA<br>qPCR NT | 0.74                              | 0.50                              | 0.48 | Moderate          | 52.291   | 1    | < 0.001 |
| Metabarcoding NT<br>qPCR TA | 0.84                              | 0.56                              | 0.63 | Good              | 0.207    | 1    | > 0.05  |
| Metabarcoding TA<br>qPCR TA | 0.86                              | 0.58                              | 0.66 | Good              | 2.561    | 1    | > 0.05  |

789

790 **Table 2.** Summary of analyses testing for variation in proportion of *T. cristatus* sequence reads in a sample  
791 produced by eDNA metabarcoding, attributable to qPCR score or post-PCR eDNA concentration. Test statistic is for  
792 LRT used.

793

| <b>Model variables</b>                 | <b><i>N</i><br/>(ponds)</b> | <b>d.f.</b> | <b>AIC</b> | <b>Effect<br/>size</b> | <b>Standard<br/>error</b> | <b><math>\chi^2</math></b> | <b><i>F</i></b> | <b><i>P</i></b> |
|----------------------------------------|-----------------------------|-------------|------------|------------------------|---------------------------|----------------------------|-----------------|-----------------|
| <b>qPCR score</b>                      | 532                         | 1           | 1578.3     | 0.373                  | 0.032                     | 150.682                    | 147.117         | < 0.001         |
| <b>post-PCR eDNA<br/>concentration</b> | 532                         | 1           | 1441.9     | -0.056                 | 0.015                     | 14.272                     | 12.457          | < 0.001         |

794

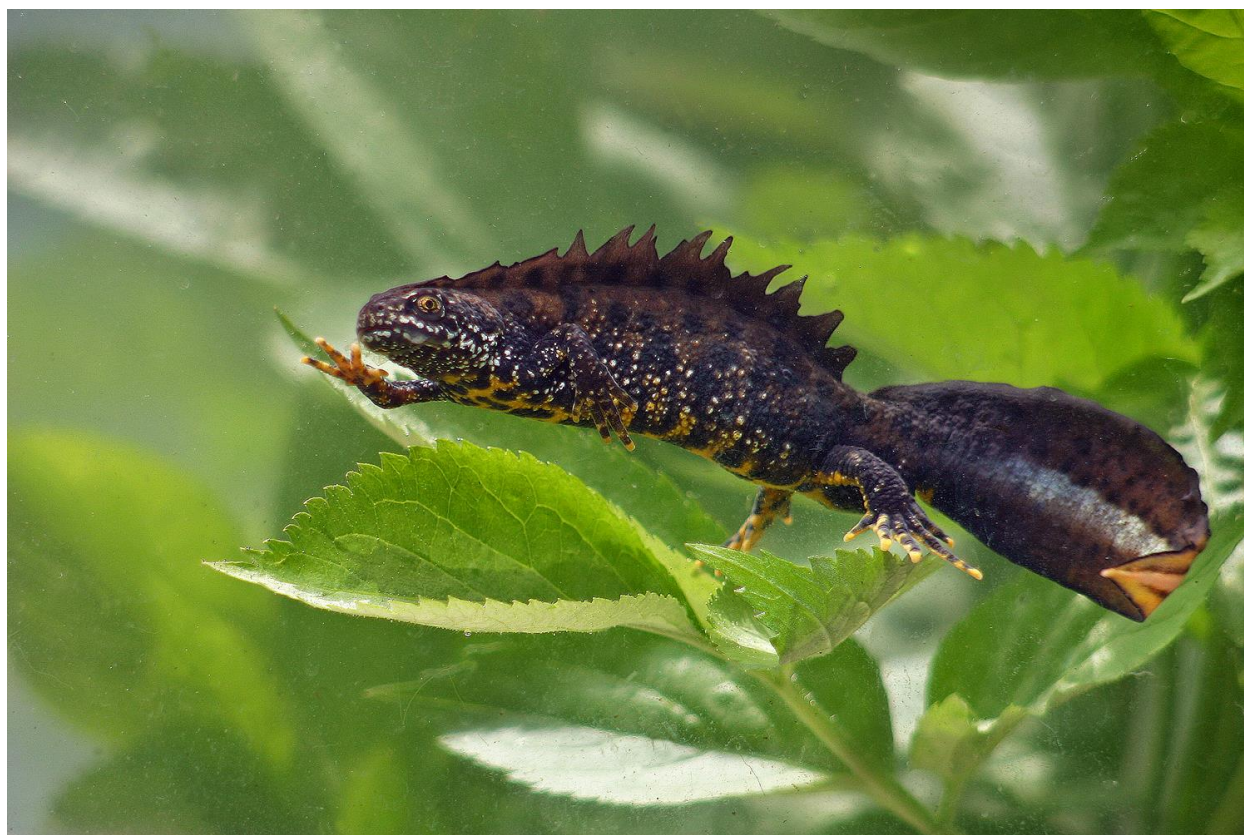

**Figure 1.** Adult male great crested newt (*Triturus cristatus*). Photo by Brett Lewis (Lewis Ecology, Brett Lewis Photography).

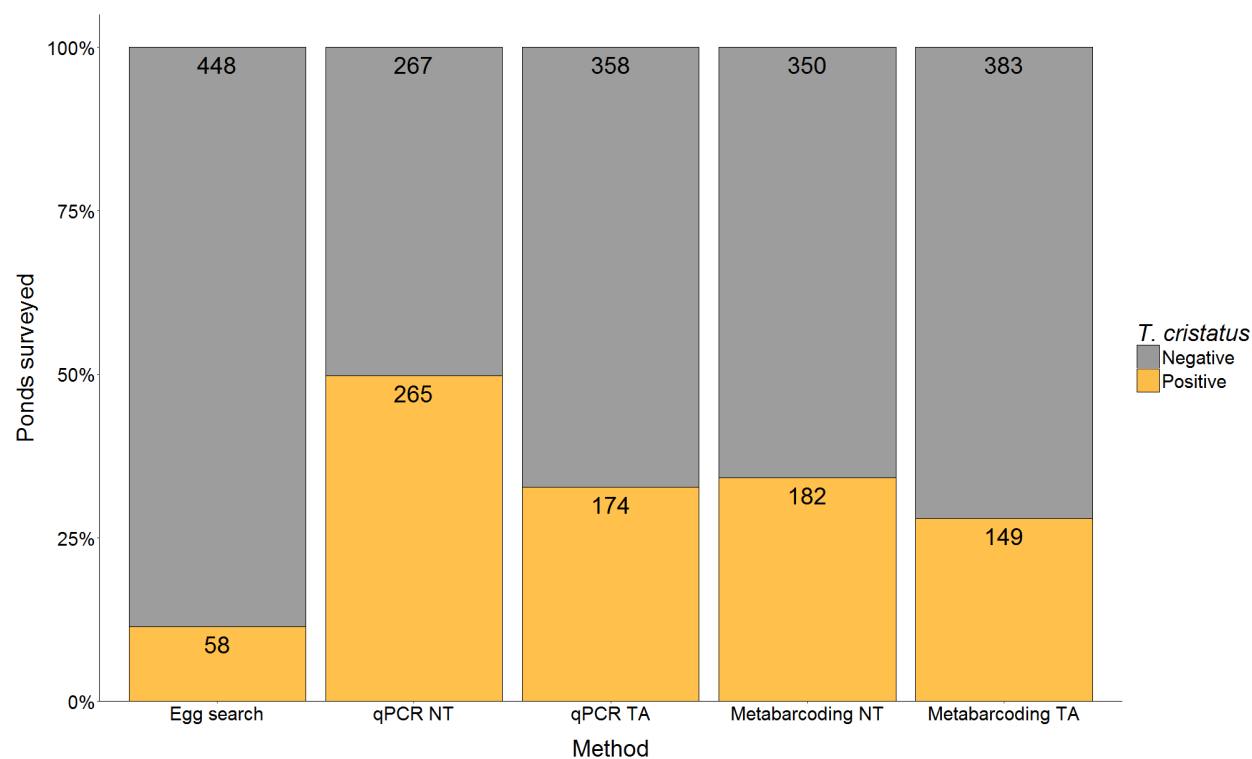

795

796 **Figure 2.** Comparison of survey methodology for *T. cristatus* detection in freshwater ponds across the UK. Bars

797 represent proportion of positive and negative *T. cristatus* ponds by each method with frequency displayed on bars.

798

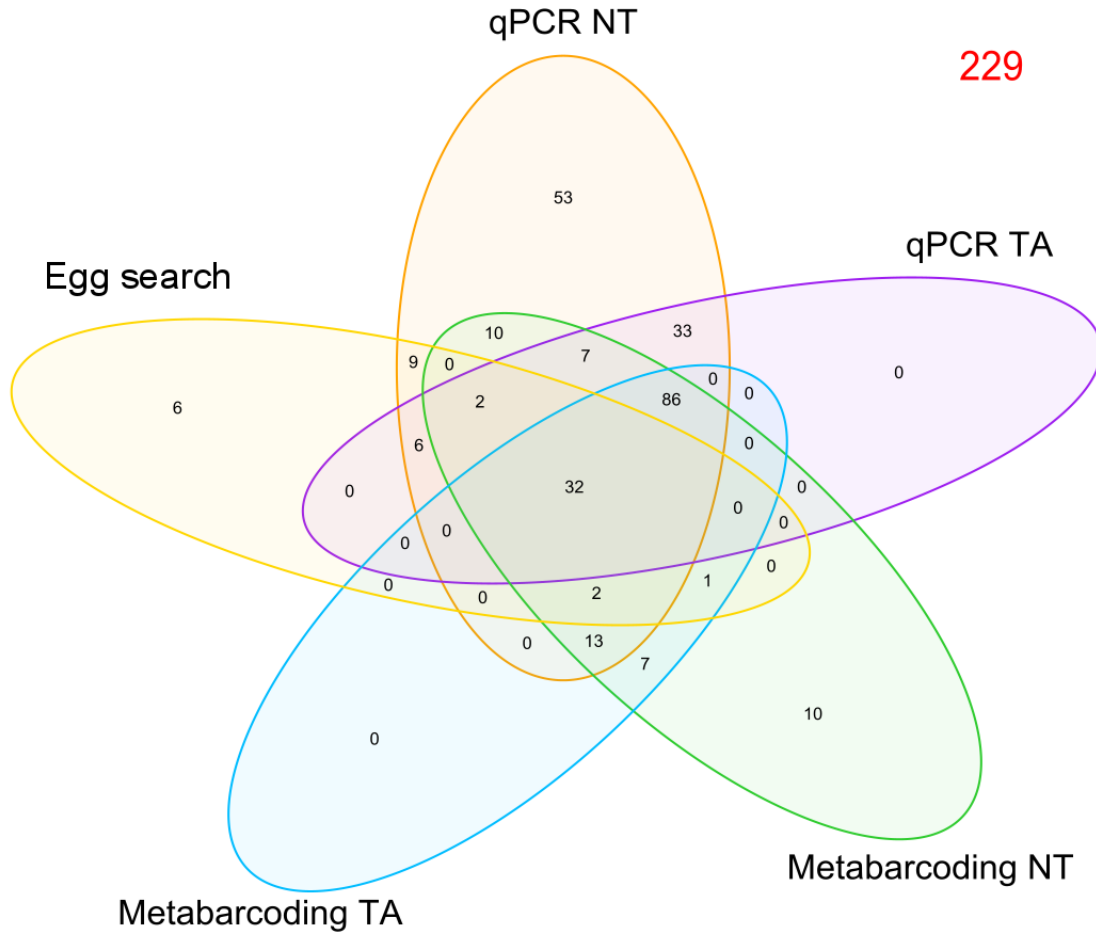

799

800 **Figure 3.** Venn diagram which summarises the number of positive *T. cristatus* detections ( $N = 277$ ) by each method  
801 (egg search, qPCR NT, qPCR TA, metabarcoding NT, and metabarcoding TA), and overlap in *T. cristatus* detection  
802 between methods, for 506 ponds where all methods were applied. Negative *T. cristatus* detections ( $N = 229$ ) are  
803 highlighted in red.

804

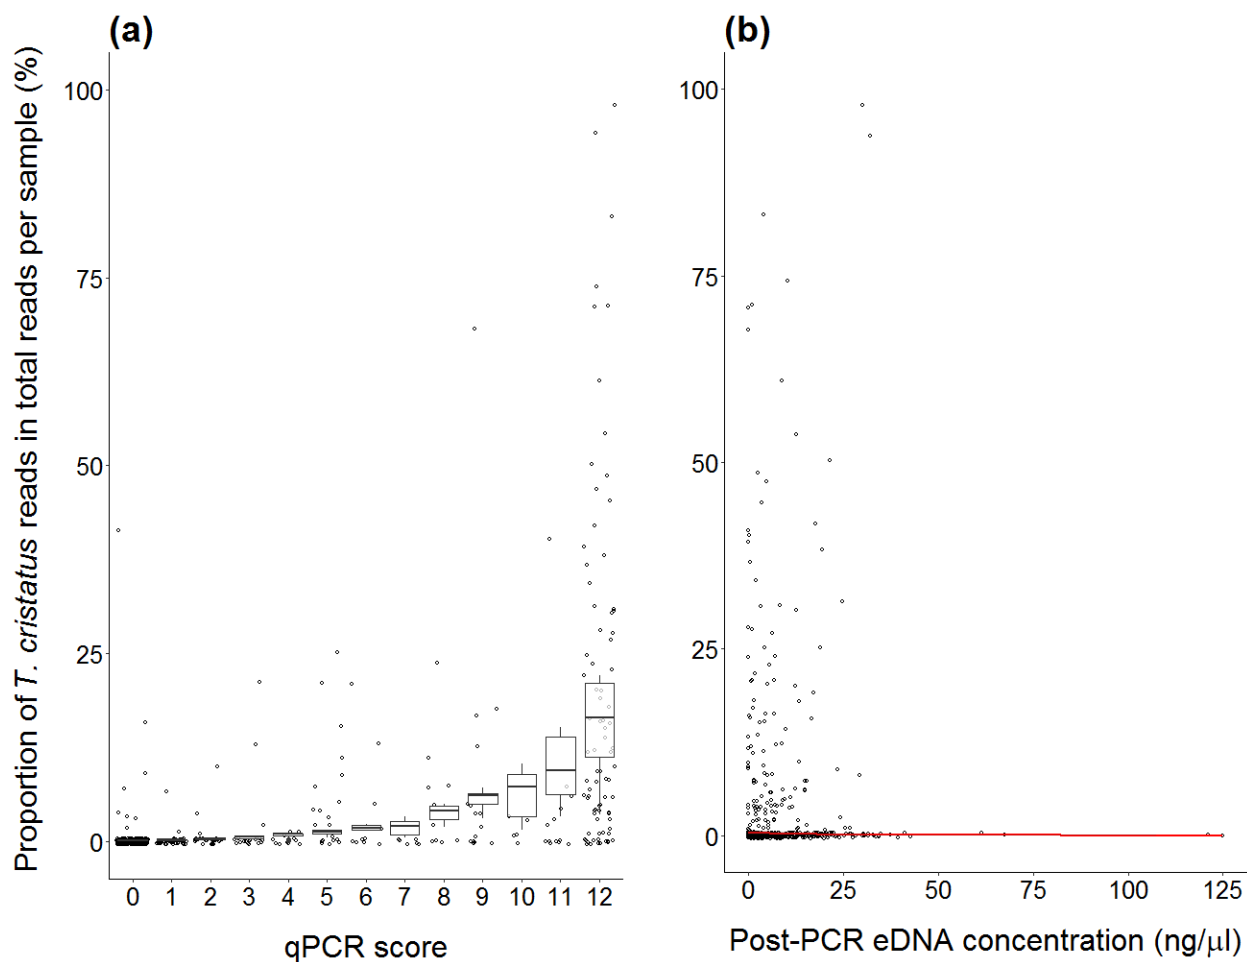

805  
806 **Figure 4.** Relationship between fixed effects (qPCR score, post-PCR eDNA concentration) and response variable  
807 (proportion of *T. cristatus* reads) in eDNA samples, as predicted by the negative binomial GLMM. The 95% CIs, as  
808 calculated using the predicted proportions, and standard error for these predictions are given for each relationship.  
809 The observed data (points) are also displayed against the predicted relationships (boxes, line). The proportion of *T.*  
810 *cristatus* reads within eDNA samples increased as qPCR score increased (a). Conversely, the proportion of *T.*  
811 *cristatus* reads decreased as post-PCR eDNA concentration increased (b).  
812

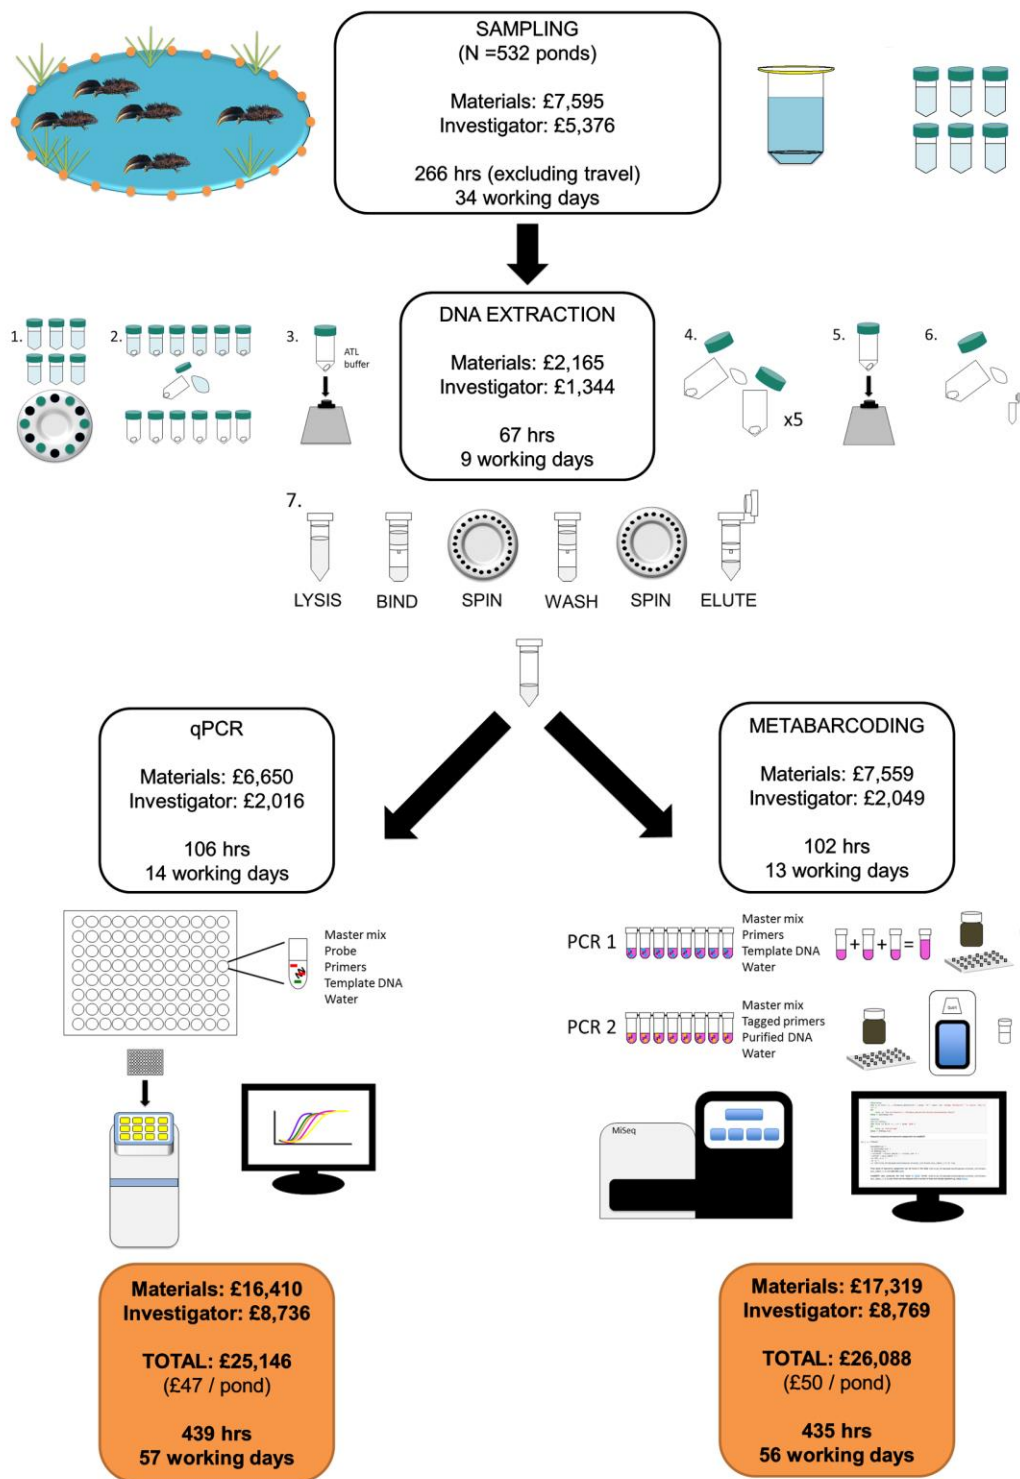

813

814 **Figure 5.** Cost and investigator effort required for targeted qPCR of *T. cristatus* and eDNA metabarcoding of

815 vertebrate communities from pond water samples.
